# Supplementary material
Source: Elsevier journal article supplement (https://www.sciencedirect.com/science/article/pii/S2173578618300945)
Supplement: mmc1 [file S2173578618300945:mmc1.pdf]

|                                                                                                                                                                                                                                                                                                                                                                                                                                                                                                                                                                                                                                                                                                                                                                                                                                                                                                                                                                              |
|------------------------------------------------------------------------------------------------------------------------------------------------------------------------------------------------------------------------------------------------------------------------------------------------------------------------------------------------------------------------------------------------------------------------------------------------------------------------------------------------------------------------------------------------------------------------------------------------------------------------------------------------------------------------------------------------------------------------------------------------------------------------------------------------------------------------------------------------------------------------------------------------------------------------------------------------------------------------------|
| <p>Tabla 1: Dominios (en negrita), Preguntas (P) y posibles respuestas incluidas en la encuesta</p>                                                                                                                                                                                                                                                                                                                                                                                                                                                                                                                                                                                                                                                                                                                                                                                                                                                                          |
| <p><b>1. Implementación de la Vigilancia Activa (VA) en España</b></p> <p>P1.1.- A cerca de la implementación de la VA en su Servicio, marque la opción más probable en su Hospital;<br/> <i>A=VA la lleva un urólogo, B=la VA la llevan dos urólogos, C= la VA la lleva el Servicio de Oncología Médica, D=la VA la lleva todo el Servicio de Urología</i></p> <p>P1.2.- ¿Durante cuánto tiempo se realiza VA en su Departamento?<br/> <i>A=&lt;6 meses, B= 6 meses-1 año, C=1-2 años, D=2-5 años, E=&gt;5 años</i></p> <p>P1.3.- ¿Usa un consentimiento informado cuando oferta VA?<br/> <i>A=Sí, uno específico, B=Sí, uno general, C= No</i></p> <p>P1.4.- ¿Se atiende un protocolo de VA?<br/> <i>A= Sí, a uno publicado, B= Sí, a uno propio, C=NO</i></p>                                                                                                                                                                                                             |
| <p><b>2. Criterios de selección</b></p> <p>P2.1.- ¿Cuál es su límite superior de edad para indicar VA?</p> <p>P2.2.- ¿Cuál es su límite superior de PSA para indicar VA?</p> <p>P2.3.- ¿Cuál es su límite superior de estadio clínico para indicar VA?<br/> <i>A=cT1c, B=cT2a, C=cT2b, D=cT2c</i></p> <p>P2.4.- ¿Considera la densidad de PSA como criterio de inclusión en VA?<br/> <i>A=Sí, B=No, C=a veces</i></p> <p>P2.5.- Si la utiliza, ¿cuál es el límite superior de PSA para incluir un paciente en VA?</p> <p>P2.6.- ¿Cuántos cilindros positivos acepta para incluir un paciente en VA?</p> <p>P2.7.- ¿Cuál es el límite de afectación por CaP de un cilindro para incluir un paciente en VA?<br/>         (respuesta puede ser en mm o % de cáncer)</p> <p>P2.8.- ¿Cuál es el límite de Gleason score que admite en VA?<br/> <i>A=3+3, B=3+4, C=4+3</i></p> <p>P2.9.- ¿Ha cambiado sus criterios de inclusión a lo largo del tiempo?<br/> <i>A=No, B=Sí</i></p> |
| <p><b>3. Caracterización inicial del CaP;</b></p> <p>P3.1.- ¿Realiza RMmp rutinariamente antes de la Bx diagnóstica?<br/> <i>A=Sí, B=No, C= solo en casos con Bx previas negativas</i></p> <p>P3.2.- ¿Determina de forma rutinaria algún otro biomarcador diferente del PSA antes de la Bx diagnóstica?<br/> <i>A=Sí, B=No, C= solo en casos de Bx previas negativas</i></p> <p>P3.3.- La RMmp es informada por;<br/> <i>A= un radiólogo, B= dos radiólogos, C= &gt; 2 radiólogos</i></p> <p>P3.4.- ¿Hay algún radiólogo en su Hospital que haya cursado un entrenamiento específico en RMmp prostática?<br/> <i>A=sí, B=no</i></p> <p>P3.4.- ¿Considera su radiólogo que informa la RMmp un experto en RMmp prostática?<br/> <i>A=no, B=sí, C=experiencia media</i></p>                                                                                                                                                                                                     |

#### **4. Periodo de confirmación;**

P4.1.- ¿Realiza Bx de confirmación? (considerando ésta a la realizada durante el primer año tras la Bx diagnóstica)

A=No, B=Sí

P4.2.- (si la practica); ¿Cuándo la realiza la Bx de confirmación? (meses)

P4.3.- ¿Realiza RMmp antes de la Bx de confirmación?

A=nunca, B= siempre, C=en algún caso

P4.5.- Si realiza Bx de confirmación, ¿qué acceso practica?

A=transrectal, B=transperineal, C= cualquiera de ellos en función del caso

P4.6.- En caso de Bx de confirmación transrectal, ¿cuántos cilindros toma?

A=10-12, B=13-20, C=>20, D= no la hago por este acceso

P4.7.- En caso de Bx de confirmación transperineal, ¿cuántos cilindros toma?

A=10-12, B=13-20, C=20-30, D=>30, E=no la hago por este acceso

P4.8.- Si realiza Bx de confirmación. ¿Usa software de fusión?

#### **5.- Estrategias de seguimiento;**

P5.1.- ¿Con qué frecuencia realiza las visitas de seguimiento? (meses)

P5.2.- ¿Con qué frecuencia realiza PSA? (meses)

P5.3.- ¿Con qué frecuencia realiza tacto rectal? (meses)

P5.4.- ¿Con qué frecuencia programa Bx de seguimiento? (meses)

P5.5.- ¿Con qué frecuencia usa cuestionarios? (meses)

P5.6.- ¿Realiza RMmp antes de las Bx durante el seguimiento?

A=Nunca, B= Siempre, C=a veces

P5.7.- ¿Mediante qué acceso practica las Bx de seguimiento?

A=Transrectal, B=Transperineal, C; cualquiera de los dos

#### **6.- Criterios para Bx por evento;**

P6.1.- ¿Contempla Bx por evento? (fuera de las programadas en el protocolo de VA)

A=Sí, B=No

P6.2.- ¿Considera el PSA total para una Bx por evento?

A=Sí, B=No (si ha dicho sí, especifique punto de corte)

P6.3.- Considera la PSAd para una Bx por evento?

A=Sí, B=No (si ha dicho sí, especifique punto de corte)

P6.4.- ¿Considera el PSADT para una Bx por evento?

A=Sí, B=No (si ha dicho sí, especifique punto de corte)

P6.5.- ¿Considera la velocidad de PSA para una Bx por evento?

A=Sí, B=No (si ha dicho sí, especifique punto de corte)

P6.6.- ¿Considera un tacto rectal sospechoso de novo para una Bx por evento?

A=Sí, B=No

P6.7.- ¿Considera una nueva lesión sospechosa en la RMmp para una Bx por evento?

A=Sí, B=No

P6.8.- ¿Considera una Bx por evento por la ansiedad del paciente?

A=Sí, B=No

#### **7.- Criterios para abandonar la VA;**

P7.1.- Condiciones en relación con el nivel de PSA para abandonar la VA (campo descriptivo)

P7.2.- ¿Considera una lesión nueva PIRADS 4-5 en la RMmp una causa para abandonar la VA?

A=Sí, B=No

P7.3.- ¿Considera el Gleason 3+4 en una Bx de seguimiento para abandonar la VA?

A=Siempre, B=Nunca, C= en algún caso

P7.4.- ¿Considera el Gleason 4+3 en Bx de seguimiento para abandonar la VA?

*A=Siempre, B=Nunca, C= en algún caso*

P7.5.- ¿Considera Gleason 4+4 en Bx de seguimiento para abandonar la VA?

*A=Siempre, B=Nunca, C= en algún caso*

P7.6.- ¿Considera la bilateralidad sin incremento del nº de cilindros afectos suficiente para abandonar VA?

*A=Sí, B=No*

P7.7.- En caso del mismo acceso en la Bx de seguimiento respecto a la Bx diagnóstica, ¿qué incremento de nº de cilindros afectos considera (sin progresión en grado) para abandonar la VA?

*A=De uno a 2 positivos, B=De 2 a 3, C= > 3 cilindros positivos*

P7.8.- ¿Considera la longitud de afectación mayor de 5mm en un único cilindro suficiente para abandonar la VA?

*A=Sí, B=No*

P7.9.- ¿Considera el porcentaje de afectación mayor de 50% en un único cilindro suficiente para abandonar la VA?

*A=Sí, B=No*

P7.10.- ¿Considera abandonar la VA por ansiedad del paciente?

*A=Sí, B=No*

### **8.- Límite superior de edad para VA;**

8.1.- En frente a un hombre con más de 10 años de expectativa de vida ¿cuál es la edad a la que considera finalizar la VA y pasar a una estrategia de observación?

*A=>75 años, B=>80años, C=>85años, D=no contemplo el límite de edad*
